# Supplementary material for: miR-130a-3p promotes cell proliferation and invasion by targeting estrogen receptor α and androgen receptor in cervical cancer
Source: PubMed Central journal article supplement — Exp Ther Med. 2021 Feb 25;21(5):414. doi: 10.3892/etm.2021.9858 (PMC7967885; doi:10.3892/etm.2021.9858), 2021-02-25

Figure S1. Verification of transfection efficiency. Transfection efficiency of (A) miR-130am, (B) miR-130ai, (C) ER $\alpha$ -overexpression vector and (D) AR-overexpression vector in HeLa and SiHa cells. \*\*P<0.01 vs. NC. miR-130am, miR-130a mimics; miR-130ai, miR-130a inhibitor; ER $\alpha$ , estrogen receptor  $\alpha$ ; AR, androgen receptor; NC, negative control.

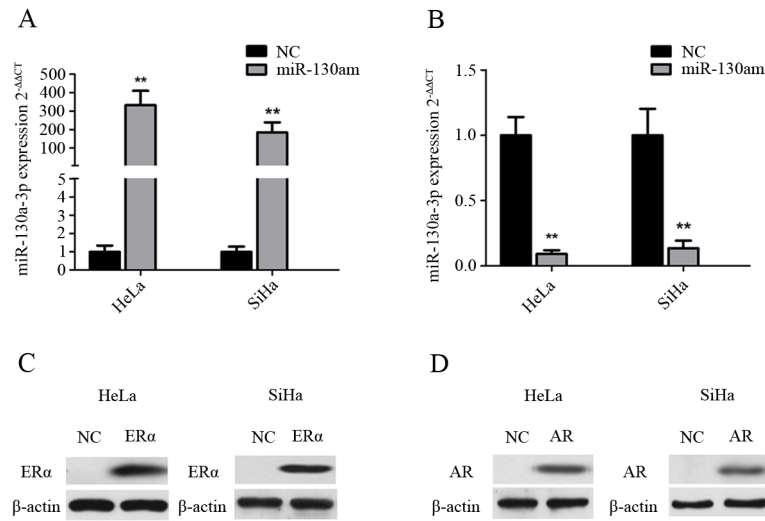

Supplement: Supplementary_Data.pdf [file Supplementary_Data.pdf]
